# Supplementary material
Source: bioRxiv or medRxiv preprint supplement (https://www.biorxiv.org/highwire/filestream/2571/field_highwire_adjunct_files/0/010140-1.pdf)
Supplement: Supplementary file [file 010140-1.pdf]

# Supporting information

## Assessing the evidence of ecosystem services studies: a framework and its application

Anne-Christine Mupepele & Carsten F. Dormann  
University of Freiburg

We applied the evidence-based concept to 12 case studies, three of them already mentioned in the main document. The details about the question, the outcome and the level of evidence after the critical appraisal are given in Table S1. We further present the quality checklist used to determine the study quality in all 12 case studies (Table S2). We covered a broad range of case studies, providing an example for all disciplinary foci (quantification, valuation, management and governance) and all different study designs.

In the main document, we state that each ecosystem service should be investigated from the perspective of all facets and that questions can be answered on all levels of evidence. Carbon sequestration was a prominent topic over the previous years (Oren *et al.*, 2001; Fernández-Martínez *et al.*, 2014) and we found studies about carbon sequestration following different study designs (Table S3). The studies vary in their geographical region and the focus of the question. They may also investigate a broader range, e.g. the value of all ecosystem services, and we extracted only the question related to carbon sequestration. No critical appraisal was performed, but this example still highlights the use of the evidence-based concept.

Table S1: Studies ranked according to the evidence-based approach. The key columns (grey section) are the question, the outcome and the final level of evidence (LoE). They are supported by context, facet and the evidence assessment with study design and quality assessment (critical appraisal)

| Reference                  | 1. Question, outcome and the context                                                                                                                                                 |                |                                                                                                                   |                                                                                                                                                                                                                            | 2. Evidence Assessment      |                   |                                                    |               |                         |
|----------------------------|--------------------------------------------------------------------------------------------------------------------------------------------------------------------------------------|----------------|-------------------------------------------------------------------------------------------------------------------|----------------------------------------------------------------------------------------------------------------------------------------------------------------------------------------------------------------------------|-----------------------------|-------------------|----------------------------------------------------|---------------|-------------------------|
|                            | Context: Ecosystem services; Ecosystem(s); Location                                                                                                                                  | Facet          | Question/Purpose investigated                                                                                     | Outcome                                                                                                                                                                                                                    | 2a. Study design ->         | Level of evidence | 2b. Quality points (see checklist S2) ->           | Quality score | Final level of evidence |
| Bowler et al. 2010         | Air conditioning in urban space; cities; global                                                                                                                                      | Management     | Can human exposure to heat be mitigated by greening urban spaces?                                                 | Green space in an urban area is on average 1°C cooler, than a built-up site.                                                                                                                                               | Systematic review           | LoE1a             | 30/31                                              | 0.97          | LoE1a                   |
| Lindhjem 2007              | Non-timber forest ecosystem services, mainly recreation; forests; Norway, Sweden, Finland                                                                                            | Valuation      | Review of people's willingness to pay for non-timber forest ecosystem services                                    | Willingness to pay (WTP) is insensitive to forest size; WTP is higher if people are asked as individuals than on behalf of their households                                                                                | Conventional review         | LoE1b             | 21/27                                              | 0.78          | LoE2                    |
| Ayanu et al. 2012          | Crops and biomass production, above ground carbon storage, amount of pollutants removed from the air, soil retained, water purification, storm mitigation, pest control; all; global | Quantification | Analysing advantages and disadvantages of several remote sensing procedures to map ecosystem services             | Description of various remote sensing techniques. Claim for more studies assessing validity, reliability and uncertainty of remote sensing procedures in quantifying and mapping ecosystem services                        | Conventional review         | LoE1b             | 11/18                                              | 0.61          | LoE2b                   |
| Liu et al. 2008            | Timber, soil erosion, carbon sequestration, recreation through wildlife observing; forests; China                                                                                    | Governance     | What is the socioeconomical and ecological impact of two payments-for-ecosystem-services programs in China?       | Socioeconomical impact: income increased, but revenues declined for local governments. Ecological impact: Timber harvest decreased locally but import increased. Carbon sequestration increased and soil erosion declined. | Conventional review         | LoE1b             | 8/23                                               | 0.35          | LoE3b                   |
| Millar et al. 2010         | Soil erosion protection; grassland; USA                                                                                                                                              | Quantification | What is the effect of sod farming on soil loss.                                                                   | Net loss of productive soil under sod farming is larger than the tolerable soil loss.                                                                                                                                      | Case-control                | LoE2a             | 18/28                                              | 0.64          | LoE3a                   |
| Acuna et al. 2013          | Food (fish), retention of organic and inorganic matter; river, forests; Iberian Peninsula                                                                                            | Management     | How does adding dead wood to stream channels affect the provision of ecosystem services?                          | Restoration of natural wood loading in streams greatly increases the ecosystem services they provide.                                                                                                                      | Before-after control-impact | LoE2a             | 19/29                                              | 0.66          | LoE3a                   |
| Lara et al. 2009           | Food (fish); marine; mediterranean                                                                                                                                                   | Quantification | Developping an index that estimates fish density, biomass and production in dependance of environmental variables | Index estimating fish density, biomass and production in dependance of surface area/volume ratio, water volume with sufficient oxygen, conductivity, chlorophyll a concentration perimeter                                 | Inferential study           | LoE3a             | 9/21                                               | 0.43          | LoE4                    |
| Barkmann et al. 2008       | Fibre, water, recreation/biodiversity, cacao; agroforestry; Indonesia                                                                                                                | Valuation      | What is the value of ecosystem services provided by a hydrological ecosystem?                                     | Willingness to pay for improving water availability equals about 1% of mean cash income of households.                                                                                                                     | Inferential study           | LoE3a             | 11/21                                              | 0.52          | LoE4                    |
| Xie et al. 2011            | Improved air quality; city; China                                                                                                                                                    | Quantification | Quantification of carbon sequestration, O <sub>2</sub> production and dust removal of different plant species     | Absolute numbers for carbon sequestration, O <sub>2</sub> production and dust removal and the differences between plant species                                                                                            | Descriptive study           | LoE3b             | 10/20                                              | 0.50          | LoE4                    |
| Karimzadegan et al. 2007   | Gas regulation, pollination, pest control and others; forests; Iran                                                                                                                  | Valuation      | What is the value of Iran's forest and rangeland ecosystem services?                                              | A value [\$] for Iran's forests and rangelands                                                                                                                                                                             | Descriptive study           | LoE3b             | 8/21                                               | 0.38          | LoE4                    |
| Entenmann and Schmitt 2013 | Biodiversity; forests; Peru                                                                                                                                                          | Governance     | Do stakeholders relate REDD+ to biodiversity conservation?                                                        | Yes, synergies between REDD+ and biodiversity conservation were assumed.                                                                                                                                                   | Descriptive study           | LoE3b             | 11/22                                              | 0.50          | LoE4                    |
| Desanker 2005              | Climate stabilisation; all; Africa                                                                                                                                                   | Governance     | How can the Clean Development Mechanism be better engaged in Africa?                                              | Projects should be initiated by locals rather than external groups, and we need fund for all forest products and services.                                                                                                 | Expert opinion              | LoE4              | not required - already on lowest level of evidence |               | LoE4                    |

Table 1: **Quality checklist** applied to 12 case studies to obtain the quality points (2b in Table S1)

| <b>Reference:</b>                                                               | Bowler et al. 2010 | Lindhjem 2007 | Ayanu et al. 2012 | Liu et al. 2008 | Millar et al. 2010 | Acuna et al. 2013 | Lara et al. 2009 | Barkm. et al. 2008 | Xie et al. 2011 | Karimz. et al. 2007 | Entenm. and Schmitt 2013 | Desanker 2005 |
|---------------------------------------------------------------------------------|--------------------|---------------|-------------------|-----------------|--------------------|-------------------|------------------|--------------------|-----------------|---------------------|--------------------------|---------------|
| <b>General aspects</b>                                                          |                    |               |                   |                 |                    |                   |                  |                    |                 |                     |                          |               |
| 1 Does the question match the answer?                                           | yes                | yes           | yes               | yes             | yes                | yes               | yes              | yes                | yes             | yes                 | yes                      | yes           |
| 2 Are the assumptions used in the study reasonable?                             | yes                | yes           | yes               | /               | yes                | yes               | no               | yes                | yes             | yes                 | yes                      | no            |
| 3 Internal validity: Do design and implementation avoid a high risk of bias?    | yes                | yes           | no                | no              | yes                | yes               | no               | yes                | no              | no                  | no                       | no            |
| 4 External validity/relevance: Is the result transferable to similar scenarios? | yes                | no            | yes               | yes             | yes                | yes               | yes              | no                 | yes             | yes                 | yes                      | yes           |
| <b>Data collection</b>                                                          |                    |               |                   |                 |                    |                   |                  |                    |                 |                     |                          |               |
| 5 Was the target population/area defined in space, time and size?               | yes                | yes           | no                | yes             | yes                | no                | yes              | no                 | no              | yes                 | yes                      | yes           |
| 6 Was a sampling population/area defined?                                       | yes                | yes           | no                | no              | yes                | yes               | yes              | yes                | yes             | yes                 | yes                      | yes           |

Table 1: **Quality checklist** applied to 12 case studies to obtain the quality points (2b in Table S1)

| <b>Reference:</b> | Bowler et al. 2010                                                                               | Lindhjem 2007 | Ayanu et al. 2012 | Liu et al. 2008 | Millar et al. 2010 | Acuna et al. 2013 | Lara et al. 2009 | Barkm. et al. 2008 | Xie et al. 2011 | Karimz. et al. 2007 | Entenm. and Schmitt 2013 | Desanker 2005 |
|-------------------|--------------------------------------------------------------------------------------------------|---------------|-------------------|-----------------|--------------------|-------------------|------------------|--------------------|-----------------|---------------------|--------------------------|---------------|
| 7                 | Were potential differences between the target population and the sampling population considered? | yes           | no                | /               | /                  | no                | /                | no                 | /               | /                   | no                       | no            |
| 8                 | Were the methods described in sufficient detail to permit replication?                           | yes           | yes               | /               | no                 | yes               | yes              | no                 | no              | yes                 | yes                      | yes           |
| 9                 | Was the sample size appropriate?                                                                 | yes           | yes               | yes             | no                 | yes               | yes              | no                 | yes             | no                  | no                       | yes           |
| 10                | Was probability sampling used for constructing the sample?                                       | /             | /                 | /               | /                  | no                | no               | no                 | no              | no                  | no                       | no            |
| 11                | If secondary data are used, did an evaluation of the original data take place?                   | yes           | yes               | yes             | no                 | /                 | /                | /                  | /               | /                   | no                       | /             |

**Analysis**

Table 1: **Quality checklist** applied to 12 case studies to obtain the quality points (2b in Table S1)

| <b>Reference:</b> | Bowler et al. 2010                                                                       | Lindhjem 2007 | Ayanu et al. 2012 | Liu et al. 2008 | Millar et al. 2010 | Acuna et al. 2013 | Lara et al. 2009 | Barkm. et al. 2008 | Xie et al. 2011 | Karimz. et al. 2007 | Entenm. and Schmitt 2013 | Desanker 2005 |
|-------------------|------------------------------------------------------------------------------------------|---------------|-------------------|-----------------|--------------------|-------------------|------------------|--------------------|-----------------|---------------------|--------------------------|---------------|
| 12                | Is the choice of statistical/analytical methods justified and comprehensively explained? | yes           | yes               | /               | /                  | yes               | yes              | no                 | yes             | no                  | /                        | yes           |
| 13                | Are variables and statistical measures given?                                            | yes           | yes               | /               | /                  | yes               | no               | yes                | yes             | yes                 | no                       | yes           |
| 14                | Was accuracy/uncertainty assessed and reported?                                          | yes           | yes               | /               | no                 | no                | yes              | no                 | no              | no                  | no                       | no            |
| <b>Results</b>    |                                                                                          |               |                   |                 |                    |                   |                  |                    |                 |                     |                          |               |
| 15                | Are results consistent and homogeneous?                                                  | yes           | yes               | /               | yes                | yes               | no               | yes                | yes             | yes                 | yes                      | yes           |
| 16                | Magnitude of effect: Is the effect large (and without large uncertainty)?                | no            | no                | /               |                    | yes               | no               | no                 | /               | no                  | no                       | no            |

Table 1: **Quality checklist** applied to 12 case studies to obtain the quality points (2b in Table S1)

| <b>Reference:</b>              | Bowler et al. 2010                                                                                                        | Lindhjem 2007 | Ayanu et al. 2012 | Liu et al. 2008 | Millar et al. 2010 | Acuna et al. 2013 | Lara et al. 2009 | Barkm. et al. 2008 | Xie et al. 2011 | Karimz. et al. 2007 | Entenm. and Schmitt 2013 | Desanker 2005 |
|--------------------------------|---------------------------------------------------------------------------------------------------------------------------|---------------|-------------------|-----------------|--------------------|-------------------|------------------|--------------------|-----------------|---------------------|--------------------------|---------------|
| 17                             | Is the outcome report complete and no information is missing?                                                             | yes           | yes               | /               | no                 | yes               | yes              | yes                | yes             | yes                 | no                       | yes           |
| 18                             | Attrition bias: Are non-response/drop-outs given and is their impact discussed?                                           | yes           | /                 | no              | no                 | /                 | /                | /                  | no              | /                   | /                        | no            |
| <b>Design-specific aspects</b> |                                                                                                                           |               |                   |                 |                    |                   |                  |                    |                 |                     |                          |               |
| <b>Review</b>                  |                                                                                                                           |               |                   |                 |                    |                   |                  |                    |                 |                     |                          |               |
| 19                             | Is there a low probability of publication bias? E.g. results reporting a negative relationship were probably not included | yes           | yes               | no              | no                 | /                 | /                | /                  | /               | /                   | /                        | /             |

Table 1: **Quality checklist** applied to 12 case studies to obtain the quality points (2b in Table S1)

| <b>Reference:</b>             | Bowler et al. 2010                                                          | Lindhjem 2007 | Ayanu et al. 2012 | Liu et al. 2008 | Millar et al. 2010 | Acuna et al. 2013 | Lara et al. 2009 | Barkm. et al. 2008 | Xie et al. 2011 | Karimz. et al. 2007 | Entenm. and Schmitt 2013 | Desanker 2005 |
|-------------------------------|-----------------------------------------------------------------------------|---------------|-------------------|-----------------|--------------------|-------------------|------------------|--------------------|-----------------|---------------------|--------------------------|---------------|
| 20                            | Is the review based on high evidence individual studies?                    | yes           | no                | yes             | no                 | /                 | /                | /                  | /               | /                   | /                        | /             |
| 21                            | Do the studies included respond to the same question?                       | yes           | yes               | yes             | /                  | /                 | /                | /                  | /               | /                   | /                        | /             |
| 22                            | Was the literature searched in a systematic way?                            | yes           | no                | yes             | no                 | /                 | /                | /                  | /               | /                   | /                        | /             |
| 23                            | Was a meta-analysis (in the strict sense: see Vetter et al. 2013) included? | yes           | yes               | no              | no                 | /                 | /                | /                  | /               | /                   | /                        | /             |
| 24                            | Were appropriate study inclusion/exclusion criteria defined?                | yes           | yes               | yes             | no                 | /                 | /                | /                  | /               | /                   | /                        | /             |
| <b>Study with a reference</b> |                                                                             |               |                   |                 |                    |                   |                  |                    |                 |                     |                          |               |

Table 1: **Quality checklist** applied to 12 case studies to obtain the quality points (2b in Table S1)

| <b>Reference:</b> | Bowler et al. 2010                                                                                                                                | Lindhjem Ayanu et al. 2012 | Liu et al. 2008 | Millar et al. 2010 | Acuna et al. 2013 | Lara et al. 2009 | Barkm. et al. 2008 | Xie et al. 2011 | Karimz. et al. 2007 | Entenm. and Schmitt 2013 | Desanker 2005 |   |
|-------------------|---------------------------------------------------------------------------------------------------------------------------------------------------|----------------------------|-----------------|--------------------|-------------------|------------------|--------------------|-----------------|---------------------|--------------------------|---------------|---|
| 25                | Selection bias: Was the assignment of case-control groups randomized?                                                                             | /                          | /               | /                  | /                 | no               | no                 | /               | /                   | /                        | /             | / |
| 26                | Were groups designed equally, aside from the investigated point of interest?                                                                      | /                          | /               | /                  | /                 | no               | yes                | /               | /                   | /                        | /             | / |
| 27                | Performance bias: Was the sampling blinded, e.g. researchers taking samples of a specific area wouldn't know the differences between these areas? | /                          | /               | /                  | /                 | no               | no                 | /               | /                   | /                        | /             | / |



Table 1: **Quality checklist** applied to 12 case studies to obtain the quality points (2b in Table S1)

| <b>Reference:</b>              | Bowler et al. 2010                                                 | Lindhjem 2007 | Ayanu et al. 2012 | Liu et al. 2008 | Millar et al. 2010 | Acuna et al. 2013 | Lara et al. 2009 | Barkm. et al. 2008 | Xie et al. 2011 | Karimz. et al. 2007 | Entenm. and Schmitt 2013 | Desanker 2005 |
|--------------------------------|--------------------------------------------------------------------|---------------|-------------------|-----------------|--------------------|-------------------|------------------|--------------------|-----------------|---------------------|--------------------------|---------------|
| 28                             | Were there sufficient replicates of treatment and reference units? | /             | /                 | /               | /                  | yes               | yes              | /                  | /               | /                   | /                        | /             |
| 29                             | Detection bias: Were outcomes measured identically between groups? | /             | /                 | /               | /                  | yes               | yes              | /                  | /               | /                   | /                        | /             |
| <b>Focus-specific aspects:</b> |                                                                    |               |                   |                 |                    |                   |                  |                    |                 |                     |                          |               |
| <b>Quantification</b>          |                                                                    |               |                   |                 |                    |                   |                  |                    |                 |                     |                          |               |
| 30                             | Is the unit of the quantification measurement appropriate?         | /             | /                 | /               | /                  | yes               | /                | yes                | /               | yes                 | /                        | /             |

Table 1: **Quality checklist** applied to 12 case studies to obtain the quality points (2b in Table S1)

| <b>Reference:</b> | Bowler et al. 2010                                                                          | Lindhjem 2007 | Ayanu et al. 2012 | Liu et al. 2008 | Millar et al. 2010 | Acuna et al. 2013 | Lara et al. 2009 | Barkm. et al. 2008 | Xie et al. 2011 | Karimz. et al. 2007 | Entenm. and Schmitt 2013 | Desanker 2005 |
|-------------------|---------------------------------------------------------------------------------------------|---------------|-------------------|-----------------|--------------------|-------------------|------------------|--------------------|-----------------|---------------------|--------------------------|---------------|
| 31                | Was temporal change of ecosystem services' quantities (e.g. annual or long-term) discussed? | /             | /                 | no              | /                  | yes               | /                | no                 | /               | no                  | /                        | /             |
| <b>Valuation</b>  |                                                                                             |               |                   |                 |                    |                   |                  |                    |                 |                     |                          |               |
| 32                | Were future values of ecosystem services considered?                                        | /             | yes               | /               | /                  | /                 | /                | /                  | no              | /                   | no                       | /             |
| 33                | If future values were considered, were they discounted with a well-motivated discount rate? | /             | yes               | /               | /                  | /                 | /                | /                  | /               | /                   | /                        | /             |

Table 1: **Quality checklist** applied to 12 case studies to obtain the quality points (2b in Table S1)

| <b>Reference:</b> | Bowler et al. 2010                                                                                                                                   | Lindhjem Ayanu et al. 2012 | Liu et al. 2008 | Millar et al. 2010 | Acuna et al. 2013 | Lara et al. 2009 | Barkm. et al. 2008 | Xie et al. 2011 | Karimz. et al. 2007 | Entenm. and Schmitt 2013 | Desanker 2005 |
|-------------------|------------------------------------------------------------------------------------------------------------------------------------------------------|----------------------------|-----------------|--------------------|-------------------|------------------|--------------------|-----------------|---------------------|--------------------------|---------------|
| 34                | If aggregate economic values for a population were estimated, was this estimation consistent with the sampling and the definition of the population? | /                          | /               | /                  | /                 | /                | /                  | no              | /                   | no                       | /             |
| 35                | If valuation took place in form of a questionnaire, was the study pre-tested and piloted?                                                            | /                          | /               | /                  | /                 | /                | /                  | yes             | /                   | /                        | /             |
| <b>Management</b> |                                                                                                                                                      |                            |                 |                    |                   |                  |                    |                 |                     |                          |               |
| 36                | Was the aim of the management intervention clearly defined?                                                                                          | yes                        | /               | /                  | /                 | /                | yes                | /               | /                   | /                        | /             |

Table 1: **Quality checklist** applied to 12 case studies to obtain the quality points (2b in Table S1)

| <b>Reference:</b> | Bowler et al. 2010                                                 | Lindhjem Ayanu et al. 2012 | Liu et al. 2008 | Millar et al. 2010 | Acuna et al. 2013 | Lara et al. 2009 | Barkm. et al. 2008 | Xie et al. 2011 | Karimz. et al. 2007 | Entenm. and Schmitt 2013 | Desanker 2005 |    |
|-------------------|--------------------------------------------------------------------|----------------------------|-----------------|--------------------|-------------------|------------------|--------------------|-----------------|---------------------|--------------------------|---------------|----|
| 37                | Were both long-term and short-term effects discussed?              | yes                        | /               | /                  | /                 | /                | yes                | /               | /                   | /                        | /             | /  |
| 38                | Did monitoring take place for an appropriate time period?          | yes                        | /               | /                  | /                 | /                | yes                | /               | /                   | /                        | /             | /  |
| 39                | Were stakeholders included?                                        | yes                        | /               | /                  | /                 | /                | no                 | /               | /                   | /                        | /             | /  |
| 40                | Was the role of stakeholders described in detail?                  | yes                        | /               | /                  | /                 | /                | /                  | /               | /                   | /                        | /             | /  |
| <b>Governance</b> |                                                                    |                            |                 |                    |                   |                  |                    |                 |                     |                          |               |    |
| 41                | Were long-term effects assessed?                                   | /                          | /               | /                  | yes               | /                | /                  | /               | /                   | /                        | /             | no |
| 42                | Was the policy instrument that was used described and well chosen? | /                          | /               | /                  | yes               | /                | /                  | /               | /                   | /                        | /             | /  |

Table 1: **Quality checklist** applied to 12 case studies to obtain the quality points (2b in Table S1)

| <b>Reference:</b>                                                                   | Bowler et al. 2010 | Lindhjem 2007 | Ayanu et al. 2012 | Liu et al. 2008 | Millar et al. 2010 | Acuna et al. 2013 | Lara et al. 2009 | Barkm. et al. 2008 | Xie et al. 2011 | Karimz. et al. 2007 | Entenm. and Schmitt 2013 | Desanker 2005 |
|-------------------------------------------------------------------------------------|--------------------|---------------|-------------------|-----------------|--------------------|-------------------|------------------|--------------------|-----------------|---------------------|--------------------------|---------------|
| 43 Was the influence of the policy instrument (incentive/law) on society discussed? | /                  | /             | /                 | yes             | /                  | /                 | /                | /                  | /               | /                   |                          | no            |
|                                                                                     | 0.97               | 0.78          | 0.61              | 0.35            | 0.64               | 0.66              | 0.43             | 0.52               | 0.50            | 0.38                | 0.50                     |               |
|                                                                                     | 30/31              | 21/27         | 11/18             | 8/23            | 18/28              | 19/29             | 9/21             | 11/21              | 10/20           | 8/21                | 11/22                    |               |

Table S2: Studies on carbon sequestration (CS) in forests. Examples are given for each facet (quantification, valuation, management, governance) and all levels of evidence

|                                                                 | <b>Quantification</b>                                                                                                   | <b>Valuation</b>                                                                                                                                               | <b>Management</b>                                                                                                                                   | <b>Governance</b>                                                                                                                                                             |
|-----------------------------------------------------------------|-------------------------------------------------------------------------------------------------------------------------|----------------------------------------------------------------------------------------------------------------------------------------------------------------|-----------------------------------------------------------------------------------------------------------------------------------------------------|-------------------------------------------------------------------------------------------------------------------------------------------------------------------------------|
| <b>Question:</b>                                                | <b>How much carbon can be captured and stored by a forest?</b>                                                          | <b>What is the value of carbon sequestration in a forest?</b>                                                                                                  | <b>How can we manage a forest to maximize carbon sequestration?</b>                                                                                 | <b>What are the best governance measures to manage a forest to maximize carbon sequestration?</b>                                                                             |
| Review (LoE1 if there are no quality shortcomings)              | Does nutrient availability determine CS in forests? (Fernandez-Martinez et al. 2014)                                    | What is the monetary value of CS provided by urban trees in Lisbon? (Roy, Byrne & Pickering 2012)                                                              | What is the effect of forest management on CS in soils? (Jandl et al. 2007)                                                                         | How can we overcome critical challenges to scale up carbon investments in carbon sequestration projects in Africa? (Jindal, Swallow & Kerr 2008)                              |
| Referenced study (LoE2 if there are no quality shortcomings)    | Does CS in forests depend on soil fertility? (Oren et al. 2001)                                                         | What is the non-market value from an afforested area in Spain? - Comparing results with contingent valuation and choice modelling (Mogas, Riera, Bennett 2006) | Impact of prescribed fire and small clear-cut tree harvesting on carbon dynamics in a mixed-conifer forest in Sierra Nevada? (Stephens et al. 2013) | What are barriers in implementing forest carbon trading? A comparison between the Clean Development Mechanism and a State-run carbon forestry program. (Corbera & Brown 2008) |
| Observational study (LoE3 if there are no quality shortcomings) | What is the reason for an increased CS in boreal deciduous forests in Canada between 1994 and 1998? (Black et al. 2000) | What is the value of CS provided by Canberra's urban forests? (Brack 2002)                                                                                     | Does carbon fixation increase with different forest management strategies (e.g. fertilization, thinning)? (Hoen 1994)                               | What are the effects of carbon taxes and subsidies on the supply of carbon services in West-Canada? (Van Kooten, Binkley & Delcourt 1995)                                     |
| Based on no data (LoE4)                                         | No study                                                                                                                | No study                                                                                                                                                       | Does proper design and management of agroforestry result in effective carbon sinks? (Montagnini & Nair 2012)                                        | What governance conditions have to be met to successfully put in practice small-scale forest carbon projects? (Boyd, Gutierrez & Chang 2007)                                  |

## References

- Acuña V, Díez JR, Flores L, *et al.* 2013. Does it make economic sense to restore rivers for their ecosystem services? *Journal of Applied Ecology* **50**: 988–997.
- Ayanu YZ, Conrad C, Nauss T, *et al.* 2012. Quantifying and mapping ecosystem services supplies and demands: a review of remote sensing applications. *Environmental science & technology* **46**: 8529–41.
- Barkmann J, Glenk K, Keil a, *et al.* 2008. Confronting unfamiliarity with ecosystem functions: The case for an ecosystem service approach to environmental valuation with stated preference methods. *Ecological Economics* **65**: 48–62.
- Black Ta, Chen WJ, Barr aG, *et al.* 2000. Increased carbon sequestration by a boreal deciduous forest in years with a warm spring. *Geophysical Research Letters* **27**: 1271–1274.
- Bowler D, Buyung-Ali L, Healey JR, *et al.* 2010. The evidence base fo community forest management as a mechanism for supplying global environmental benefits and improving local welfare. *Collaboration for Environmental Evidence* **011**.
- Boyd E, Gutierrez M, and Chang M. 2007. Small-scale forest carbon projects: Adapting CDM to low-income communities. *Global Environmental Change* **17**: 250–259.
- Brack CL. 2002. Pollution mitigation and carbon sequestration by an urban forest. *Environmental pollution* **116**: 195–200.
- Corbera E and Brown K. 2008. Building Institutions to Trade Ecosystem Services: Marketing Forest Carbon in Mexico. *World Development* **36**: 1956–1979.
- Desanker PV. 2005. The Kyoto Protocol and the CDM in Africa: a good idea but .... *Unasylva* **56**: 24–26.
- Entenmann SK and Schmitt CB. 2013. Actors' perceptions of forest biodiversity values and policy issues related to REDD plus implementation in Peru. *Biodiversity and Conservation* **22**: 1229–1254.
- Fernández-Martínez M, Vicca S, Janssens IA, *et al.* 2014. Nutrient availability as the key regulator of global forest carbon balance. *Nature Climate Change* **4**: 471–476.
- Hoen HF. 1994. Potential and Economic Efficiency of Carbon Sequestration in Forest Biomass Through Silvicultural Management. *Forest Science* **40**: 429–451.
- Jandl R, Lindner M, Vesterdal L, *et al.* 2007. How strongly can forest management influence soil carbon sequestration? *Geoderma* **137**: 253–268.
- Jindal R, Swallow B, and Kerr J. 2008. Forestry-based carbon sequestration projects in Africa: Potential benefits and challenges. *Natural Resources Forum* **32**: 116–130.
- Karimzadegan H, Rahmatian H, Dehghani Salmasi M, *et al.* 2007. Valuing Forests and Rangelands-Ecosystem Services. *International Journal of Environmental Research* **1**: 368–377.

- Lara G, Encina L, and Rodríguez -Ruiz A. 2009. Trophometric index: a predictor for fish density, biomass and production in Mediterranean reservoirs in Spain. *Fisheries Management and Ecology* **16**: 341–351.
- Lindhjem H. 2007. 20 years of stated preference valuation of non-timber benefits from Fennoscandian forests: A meta-analysis. *Journal of Forest Economics* **12**: 251–277.
- Liu J, Li S, and Ouyang Z. 2008. Ecological and socioeconomic effects of China's policies for ecosystem services. *Proceedings of the National Academy of Sciences* **105**: 94779482.
- Millar D, Stolt M, and Amador JA. 2010. Quantification and Implications of Soil Losses from Commercial Sod Production. *Soil Science Society of America Journal* **74**: 892–897.
- Mogas J, Riera P, and Bennett J. 2006. A comparison of contingent valuation and choice modelling with second-order interactions. *Journal of Forest Economics* **12**: 5–30.
- Montagnini F and Nair PKR. 2012. Carbon sequestration : An underexploited environmental benefit of agroforestry systems. *Agroforestry Systems* 281–295.
- Oren R, Ellsworth DS, Johnsen KH, *et al.* 2001. Soil fertility limits carbon sequestration by forest ecosystems in a CO<sub>2</sub>-enriched atmosphere. *Nature* **411**: 469–72.
- Roy S, Byrne J, and Pickering C. 2012. A systematic quantitative review of urban tree benefits, costs, and assessment methods across cities in different climatic zones. *Urban Forestry & Urban Greening* **11**: 351–363.
- Stephens S, Collins BM, Dore S, *et al.* 2013. Climate Change, Carbon Sequestration, and Wildfire Management in Sierran Mixed Conifer Forests. Technical Report 90, JFSP Research Project Reports.
- van Kooten GC, Binkley CS, and Delcourt G. 1995. Effect of Carbon Taxes and Subsidies on Optimal Forest Rotation Age and Supply of Carbon Services. *American Journal of Agricultural Economics* **77**: 365.
- Xie QJ, Zhou ZX, and Chen F. 2011. Quantifying the Beneficial Effect of Different Plant Species On Air Quality Improvement. *Environmental Engineering and Management Journal* **10**: 959–963.
